# Supplementary material for: A Langmuir–Schaefer approach for the synthesis of highly ordered organoclay thin films
Source: Royal Society of Chemistry journal article supplement (doi:10.1039/c0cp00286k), 2010-01-01
Supplement: c0cp00286k.pdf [file c0cp00286k.pdf]

## A Langmuir-Schaefer approach for the synthesis of highly ordered organoclay thin films

L. M. Toma<sup>a\*</sup>, R. Y. N. Gengler<sup>a\*</sup>, E. B. Prinsen<sup>a</sup>, D. Gournis<sup>a,b</sup> and P. Rudolf<sup>a</sup>

<sup>a</sup> *Zernike Institute for Advanced Materials, University of Groningen, Nijenborgh 4, NL-9747AG Groningen, The Netherlands*

<sup>b</sup> *Department of Materials Science and Engineering, University of Ioannina, GR-45110 Ioannina, Greece*

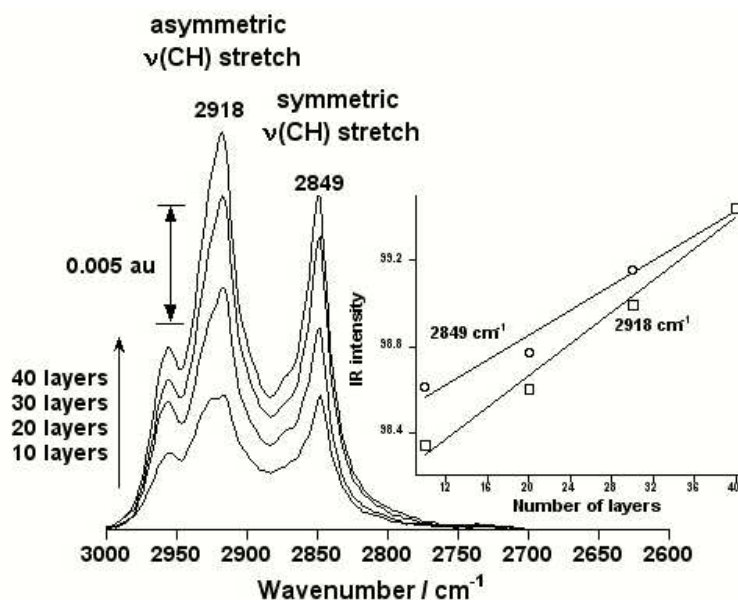

**Figure S1.** Infrared spectra of the  $\nu(\text{CH})$  region for hybrid DODA-montmorillonite films of different thickness (from 10 to 40 DODA-clay layers), transferred onto  $\text{CaF}_2$  plates at a surface pressure of  $10 \text{ mN m}^{-1}$  and for a clay concentration in the subphase of  $200 \text{ mg dm}^{-3}$  (the inset shows the relation between the IR intensity and the number of layers).

\* L.M. Toma and R.Y.N. Gengler contributed equally to this work.

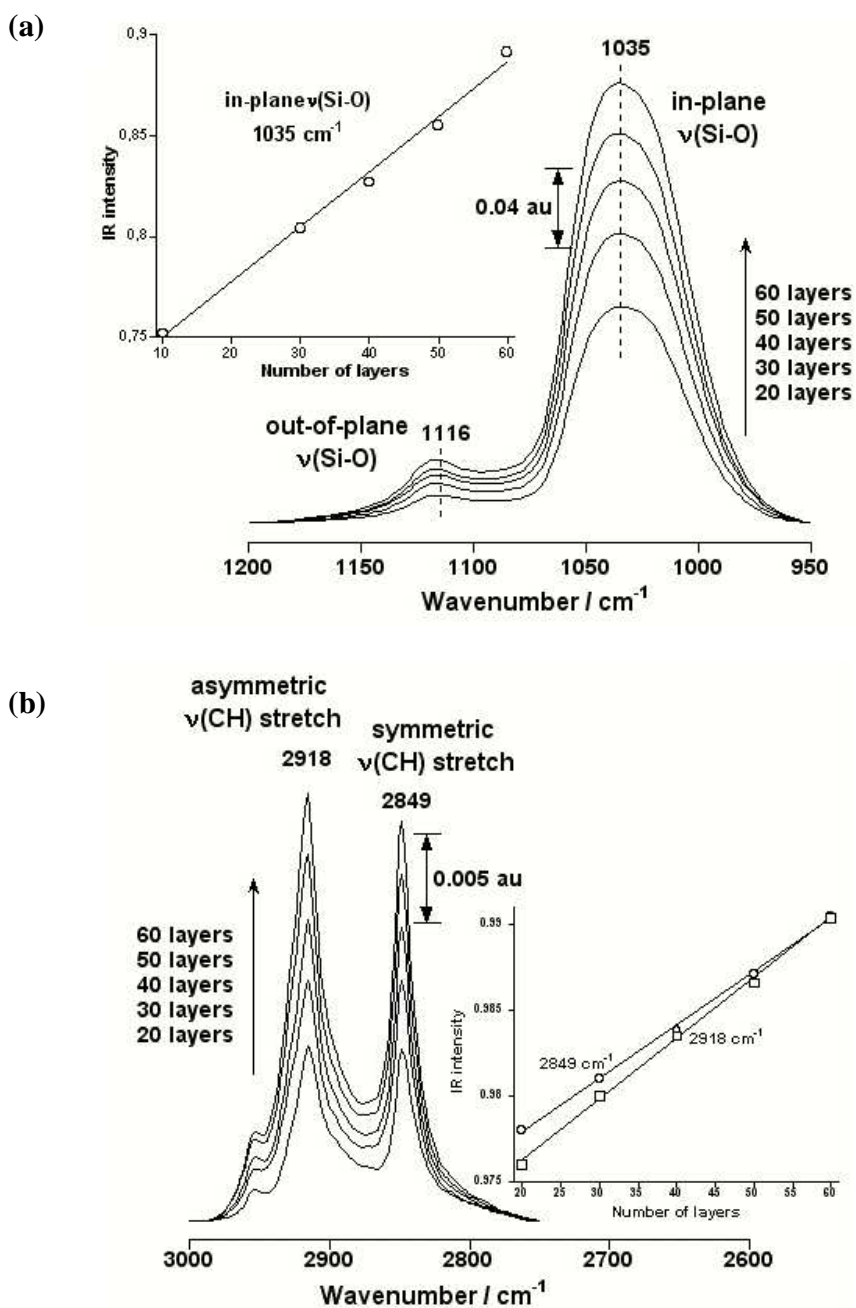

**Figure S2.** Infrared spectra of the (a)  $\nu(\text{Si-O})$  and (b)  $\nu(\text{CH})$  regions for hybrid DODA-montmorillonite films of different thickness (from 20 to 60 DODA-clay layers), transferred onto  $\text{CaF}_2$  plates at a surface pressure of  $10 \text{ mN m}^{-1}$  and for a clay concentration in the subphase of  $60 \text{ mg dm}^{-3}$  (the insets show the relation between the IR intensity and the number of layers).

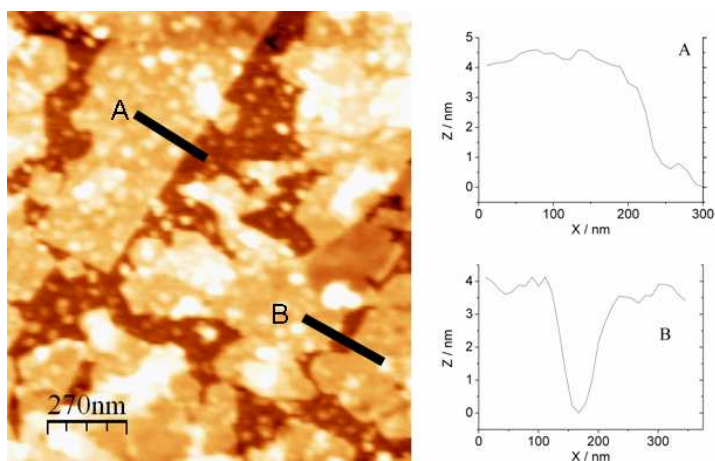

**Figure S3.** AFM profile for hybrid monolayers of DODA and montmorillonite clay particles transferred onto glass plates at the surface pressure of  $10 \text{ mN m}^{-1}$ . The clay concentration in the suspension was  $10 \text{ mg dm}^{-3}$ .

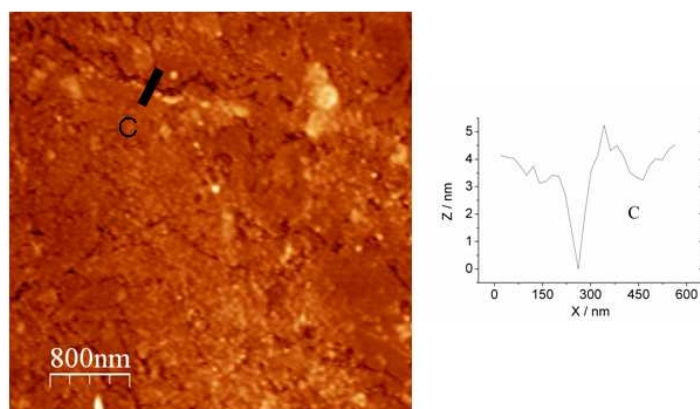

**Figure S4.** AFM profile for hybrid monolayers of DODA and montmorillonite clay particles transferred onto glass plates at the surface pressure of  $15 \text{ mN m}^{-1}$ . The clay concentration in the suspension was  $10 \text{ mg dm}^{-3}$ .
